# Supplementary material
Source: PubMed Central journal article supplement (PMC10152690)
Supplement: kiad052_supplementary_data.pdf [file kiad052_supplementary_data.pdf]

## Supplemental

Messant *et al.*

Manganese excess and deficiency affect chloroplast structure and the photosynthetic apparatus in *Marchantia polymorpha*

**Table S1. Chlorophyll and Mn content in thalli grown in Mn excess**

| sample      | mg Chl/g DW      | mg Mn/g DW | $\mu\text{g Mn/mg Chl}$ | $\mu\text{g Mn in Chloroplast/g DW}$ |
|-------------|------------------|------------|-------------------------|--------------------------------------|
| Crtl (agar) | $14.6 \pm 1.2$   | 0.23       | 2.1                     | $30.3 \pm 0.10$                      |
| 30x         | $10.6 \pm 1.7^*$ | 2.71       | 23.6                    | $250.8 \pm 0.09^{***}$               |
| 200x        | $8.8 \pm 1.3^*$  | 23.12      | 178.7                   | $1566.2 \pm 0.06^{***}$              |

Chlorophyll content and dry weight was determined by three consecutive acetone extractions (N=6). Values of Mn content are the same as in Figs 1. 2 of the main manuscript. Mean value and SE is given. Stars indicate significant differences based on a Mann and Whitney test (\*  $p < 0.05$ . \*\*\*  $p < 0.001$ ). Chlorophyll content was determined according to Porra and Scheer (2019).

Messant *et al.*

Manganese excess and deficiency affect chloroplast structure and the photosynthetic apparatus in *Marchantia polymorpha*

**Table S2. List of 96 metabolites identified by GC-MS in *Marchantia polymorpha***

| Metabolites                     | Control |       | 30X   |       | 200X  |       | Starch+Mn |       | Starch-Mn |       |
|---------------------------------|---------|-------|-------|-------|-------|-------|-----------|-------|-----------|-------|
|                                 | Mean    | SD    | Mean  | SD    | Mean  | SD    | Mean      | SD    | Mean      | SD    |
| 1.3-propanediol                 | 0.011   | 0.000 | 0.012 | 0.000 | 0.011 | 0.000 | 0.011     | 0.001 | 0.011     | 0.001 |
| 1.6-anhydro-glucose             | 0.005   | 0.001 | 0.004 | 0.000 | 0.002 | 0.000 | 0.002     | 0.001 | 0.002     | 0.001 |
| 2.3-butanediol                  | 0.005   | 0.001 | 0.005 | 0.000 | 0.004 | 0.000 | 0.005     | 0.000 | 0.004     | 0.000 |
| 2-hydroxypyridine               | 0.021   | 0.003 | 0.017 | 0.002 | 0.014 | 0.001 | 0.015     | 0.001 | 0.012     | 0.002 |
| 3.4-dihydroxymandelic acid      | 0.003   | 0.001 | 0.002 | 0.000 | 0.008 | 0.002 | 0.002     | 0.000 | 0.001     | 0.000 |
| 3-hydroxy-3-methylglutaric acid | 0.005   | 0.000 | 0.004 | 0.000 | 0.003 | 0.000 | 0.003     | 0.001 | 0.002     | 0.001 |
| 4-hydroxypyridine               | 0.003   | 0.000 | 0.002 | 0.000 | 0.002 | 0.000 | 0.002     | 0.000 | 0.002     | 0.000 |
| acetohydroxamic acid            | 0.030   | 0.004 | 0.028 | 0.003 | 0.034 | 0.006 | 0.030     | 0.005 | 0.034     | 0.006 |
| allantoin                       | 0.007   | 0.004 | 0.012 | 0.008 | 0.008 | 0.003 | 0.001     | 0.001 | 0.000     | 0.000 |
| alpha ketoglutaric acid         | 0.029   | 0.004 | 0.006 | 0.006 | 0.000 | 0.000 | 0.011     | 0.010 | 0.010     | 0.009 |
| arabinose                       | 0.003   | 0.000 | 0.003 | 0.000 | 0.003 | 0.000 | 0.001     | 0.000 | 0.001     | 0.000 |
| arbutin                         | 0.002   | 0.000 | 0.002 | 0.000 | 0.002 | 0.000 | 0.001     | 0.000 | 0.000     | 0.000 |
| aspartic acid                   | 0.750   | 0.207 | 0.585 | 0.114 | 0.385 | 0.053 | 0.086     | 0.027 | 0.155     | 0.130 |
| benzoic acid                    | 0.003   | 0.000 | 0.003 | 0.000 | 0.003 | 0.000 | 0.003     | 0.000 | 0.003     | 0.000 |
| Beta- alanine                   | 0.004   | 0.001 | 0.003 | 0.001 | 0.004 | 0.001 | 0.001     | 0.000 | 0.001     | 0.001 |
| beta-cyano-L-alanine            | 0.002   | 0.000 | 0.004 | 0.002 | 0.020 | 0.007 | 0.001     | 0.000 | 0.001     | 0.000 |
| beta-sitosterol                 | 0.004   | 0.001 | 0.004 | 0.001 | 0.004 | 0.001 | 0.002     | 0.001 | 0.002     | 0.001 |
| citramalic acid                 | 0.005   | 0.000 | 0.004 | 0.000 | 0.002 | 0.000 | 0.004     | 0.001 | 0.004     | 0.003 |
| citric acid                     | 0.285   | 0.010 | 0.295 | 0.017 | 0.037 | 0.005 | 0.289     | 0.063 | 0.247     | 0.091 |
| citrulline                      | 0.001   | 0.000 | 0.001 | 0.000 | 0.003 | 0.001 | 0.000     | 0.000 | 0.000     | 0.000 |
| D-(+) trehalose                 | 0.053   | 0.003 | 0.049 | 0.008 | 0.083 | 0.012 | 0.036     | 0.011 | 0.021     | 0.008 |
| dehydroascorbic acid            | 0.007   | 0.001 | 0.004 | 0.000 | 0.005 | 0.001 | 0.001     | 0.000 | 0.001     | 0.000 |
| D-glucose                       | 0.239   | 0.035 | 0.252 | 0.068 | 0.218 | 0.058 | 0.411     | 0.233 | 0.234     | 0.081 |
| D-glucose-6-phosphate           | 0.015   | 0.002 | 0.010 | 0.003 | 0.005 | 0.001 | 0.010     | 0.005 | 0.006     | 0.003 |
| DL-isoleucine                   | 0.060   | 0.015 | 0.061 | 0.010 | 0.046 | 0.014 | 0.028     | 0.006 | 0.023     | 0.009 |
| D-malic acid                    | 0.453   | 0.067 | 0.288 | 0.051 | 0.048 | 0.009 | 0.654     | 0.299 | 0.618     | 0.257 |
| D-mannitol                      | 0.013   | 0.010 | 0.009 | 0.007 | 0.009 | 0.006 | 0.023     | 0.022 | 0.024     | 0.019 |
| D-mannose                       | 0.005   | 0.000 | 0.004 | 0.000 | 0.004 | 0.000 | 0.045     | 0.042 | 0.002     | 0.000 |
| dopamine (hydroxytyramine)      | 1.589   | 0.178 | 1.144 | 0.201 | 1.810 | 0.252 | 0.612     | 0.074 | 0.260     | 0.019 |
| D-sorbitol                      | 0.008   | 0.001 | 0.007 | 0.000 | 0.006 | 0.000 | 0.007     | 0.001 | 0.006     | 0.000 |
| D-threitol                      | 0.010   | 0.003 | 0.008 | 0.002 | 0.008 | 0.003 | 0.017     | 0.013 | 0.023     | 0.013 |
| fructose                        | 0.182   | 0.027 | 0.203 | 0.060 | 0.173 | 0.045 | 0.261     | 0.134 | 0.166     | 0.065 |
| fructose 6-phosphate            | 0.008   | 0.001 | 0.006 | 0.001 | 0.003 | 0.001 | 0.005     | 0.002 | 0.003     | 0.001 |
| fumaric acid                    | 0.180   | 0.031 | 0.126 | 0.030 | 0.022 | 0.002 | 0.070     | 0.008 | 0.067     | 0.028 |

|                               |       |       |       |       |       |       |       |       |       |       |
|-------------------------------|-------|-------|-------|-------|-------|-------|-------|-------|-------|-------|
| galactonic acid               | 0.001 | 0.000 | 0.001 | 0.000 | 0.000 | 0.000 | 0.092 | 0.088 | 0.009 | 0.005 |
| galacturonic acid             | 0.004 | 0.000 | 0.004 | 0.001 | 0.008 | 0.001 | 0.013 | 0.008 | 0.005 | 0.003 |
| gluconic acid                 | 0.003 | 0.000 | 0.003 | 0.000 | 0.002 | 0.000 | 0.002 | 0.001 | 0.002 | 0.000 |
| glyceric acid                 | 0.016 | 0.001 | 0.014 | 0.001 | 0.006 | 0.001 | 0.016 | 0.005 | 0.013 | 0.006 |
| glycerol                      | 0.014 | 0.001 | 0.013 | 0.001 | 0.011 | 0.001 | 0.011 | 0.002 | 0.010 | 0.002 |
| glycerol 1-phosphate          | 0.021 | 0.002 | 0.016 | 0.002 | 0.011 | 0.002 | 0.010 | 0.003 | 0.007 | 0.001 |
| glycine                       | 0.007 | 0.001 | 0.006 | 0.001 | 0.006 | 0.001 | 0.002 | 0.000 | 0.003 | 0.001 |
| glycolic acid                 | 0.013 | 0.001 | 0.015 | 0.001 | 0.014 | 0.001 | 0.009 | 0.000 | 0.009 | 0.002 |
| L-(+) lactic acid             | 0.012 | 0.001 | 0.016 | 0.004 | 0.012 | 0.001 | 0.014 | 0.003 | 0.012 | 0.002 |
| L-alanine                     | 0.010 | 0.002 | 0.010 | 0.002 | 0.004 | 0.001 | 0.003 | 0.001 | 0.003 | 0.002 |
| L-asparagine                  | 0.372 | 0.021 | 0.461 | 0.074 | 0.478 | 0.085 | 0.059 | 0.036 | 0.108 | 0.095 |
| leucrose                      | 0.003 | 0.000 | 0.004 | 0.001 | 0.005 | 0.001 | 0.001 | 0.000 | 0.001 | 0.000 |
| L-glutamic acid               | 2.642 | 0.178 | 2.568 | 0.065 | 2.024 | 0.148 | 1.143 | 0.298 | 1.078 | 0.449 |
| L-glutamine                   | 0.107 | 0.013 | 0.080 | 0.022 | 0.202 | 0.078 | 0.023 | 0.019 | 0.023 | 0.022 |
| L-homoserine                  | 0.002 | 0.000 | 0.002 | 0.000 | 0.002 | 0.000 | 0.001 | 0.000 | 0.000 | 0.000 |
| L-leucine                     | 0.004 | 0.001 | 0.007 | 0.001 | 0.007 | 0.001 | 0.007 | 0.002 | 0.006 | 0.001 |
| L-lysine                      | 0.003 | 0.001 | 0.002 | 0.001 | 0.004 | 0.002 | 0.001 | 0.000 | 0.000 | 0.000 |
| L-methionine sulfoxide        | 0.001 | 0.000 | 0.001 | 0.000 | 0.001 | 0.000 | 0.000 | 0.000 | 0.000 | 0.000 |
| L-norleucine                  | 0.059 | 0.013 | 0.066 | 0.015 | 0.043 | 0.015 | 0.025 | 0.007 | 0.018 | 0.005 |
| L-ornithine                   | 0.003 | 0.001 | 0.003 | 0.000 | 0.007 | 0.001 | 0.001 | 0.000 | 0.001 | 0.001 |
| L-proline                     | 0.010 | 0.002 | 0.011 | 0.001 | 0.009 | 0.001 | 0.004 | 0.000 | 0.005 | 0.002 |
| L-serine                      | 0.625 | 0.028 | 0.617 | 0.037 | 0.616 | 0.113 | 0.157 | 0.040 | 0.138 | 0.069 |
| L-threonine                   | 0.080 | 0.008 | 0.070 | 0.010 | 0.042 | 0.006 | 0.028 | 0.007 | 0.024 | 0.010 |
| L-threonine                   | 0.025 | 0.005 | 0.036 | 0.018 | 0.070 | 0.019 | 0.005 | 0.001 | 0.004 | 0.000 |
| L-tryptophan                  | 0.043 | 0.019 | 0.036 | 0.017 | 0.134 | 0.035 | 0.005 | 0.002 | 0.003 | 0.002 |
| L-valine                      | 0.046 | 0.007 | 0.054 | 0.014 | 0.060 | 0.013 | 0.026 | 0.005 | 0.022 | 0.006 |
| maltose                       | 0.002 | 0.001 | 0.003 | 0.000 | 0.002 | 0.001 | 0.084 | 0.067 | 0.022 | 0.011 |
| myo-inositol                  | 0.042 | 0.003 | 0.041 | 0.001 | 0.031 | 0.003 | 0.022 | 0.005 | 0.018 | 0.004 |
| myristic acid                 | 0.005 | 0.000 | 0.004 | 0.001 | 0.004 | 0.000 | 0.005 | 0.001 | 0.004 | 0.000 |
| N-ethylglycine                | 0.849 | 0.030 | 0.888 | 0.093 | 1.101 | 0.039 | 0.755 | 0.089 | 0.743 | 0.053 |
| N-methylalanine               | 0.021 | 0.002 | 0.670 | 0.237 | 1.101 | 0.038 | 0.607 | 0.210 | 0.743 | 0.053 |
| norepinephrine (noradrenalin) | 0.008 | 0.002 | 0.006 | 0.002 | 0.020 | 0.003 | 0.007 | 0.003 | 0.003 | 0.001 |
| norvaline                     | 0.086 | 0.015 | 0.092 | 0.015 | 0.069 | 0.020 | 0.047 | 0.008 | 0.044 | 0.019 |
| oleic acid                    | 0.005 | 0.000 | 0.004 | 0.001 | 0.004 | 0.000 | 0.004 | 0.001 | 0.005 | 0.001 |
| O-phosphocolamine             | 0.005 | 0.001 | 0.003 | 0.001 | 0.002 | 0.000 | 0.002 | 0.001 | 0.001 | 0.001 |
| oxalic acid                   | 0.024 | 0.004 | 0.023 | 0.002 | 0.018 | 0.003 | 0.013 | 0.002 | 0.013 | 0.005 |
| palmitic acid                 | 0.146 | 0.019 | 0.134 | 0.025 | 0.140 | 0.025 | 0.164 | 0.034 | 0.146 | 0.021 |
| phenanthrene                  | 0.007 | 0.001 | 0.006 | 0.001 | 0.007 | 0.001 | 0.006 | 0.000 | 0.007 | 0.001 |
| Phenylalanine                 | 0.018 | 0.002 | 0.019 | 0.002 | 0.009 | 0.002 | 0.006 | 0.003 | 0.005 | 0.001 |
| phosphoric acid               | 0.615 | 0.138 | 0.318 | 0.124 | 0.093 | 0.019 | 0.589 | 0.176 | 0.510 | 0.280 |
| phytol                        | 0.050 | 0.002 | 0.046 | 0.006 | 0.089 | 0.024 | 0.016 | 0.007 | 0.011 | 0.005 |
| porphine                      | 0.032 | 0.003 | 0.030 | 0.002 | 0.039 | 0.002 | 0.029 | 0.001 | 0.024 | 0.001 |
| putrescine                    | 0.003 | 0.001 | 0.002 | 0.000 | 0.008 | 0.001 | 0.000 | 0.000 | 0.001 | 0.000 |
| pyruvic acid                  | 0.006 | 0.001 | 0.005 | 0.000 | 0.003 | 0.000 | 0.001 | 0.001 | 0.002 | 0.001 |
| rhamnose                      | 0.004 | 0.000 | 0.004 | 0.001 | 0.008 | 0.001 | 0.002 | 0.000 | 0.001 | 0.000 |
| shikimic acid                 | 0.209 | 0.043 | 0.168 | 0.031 | 0.068 | 0.010 | 0.265 | 0.106 | 0.127 | 0.074 |
| stearic acid                  | 0.076 | 0.017 | 0.073 | 0.021 | 0.087 | 0.019 | 0.098 | 0.022 | 0.098 | 0.023 |

|                           |       |       |       |       |       |       |       |       |       |       |
|---------------------------|-------|-------|-------|-------|-------|-------|-------|-------|-------|-------|
| stigmasterol              | 0.022 | 0.003 | 0.023 | 0.003 | 0.021 | 0.002 | 0.009 | 0.002 | 0.007 | 0.002 |
| succinic acid             | 0.074 | 0.006 | 0.080 | 0.008 | 0.040 | 0.007 | 0.093 | 0.019 | 0.096 | 0.041 |
| Sucrose                   | 2.261 | 0.326 | 2.004 | 0.232 | 1.473 | 0.293 | 1.571 | 0.421 | 1.042 | 0.277 |
| tagatose                  | 0.005 | 0.000 | 0.004 | 0.000 | 0.074 | 0.071 | 0.079 | 0.046 | 0.085 | 0.084 |
| talose                    | 0.005 | 0.000 | 0.004 | 0.000 | 0.004 | 0.000 | 0.004 | 0.001 | 0.002 | 0.000 |
| threonic acid             | 0.102 | 0.010 | 0.120 | 0.016 | 0.098 | 0.008 | 0.082 | 0.008 | 0.062 | 0.010 |
| Threonic acid-1.4-lactone | 0.007 | 0.001 | 0.008 | 0.001 | 0.016 | 0.003 | 0.004 | 0.000 | 0.003 | 0.001 |
| trans-aconitic acid       | 0.475 | 0.054 | 0.362 | 0.049 | 0.031 | 0.006 | 0.407 | 0.151 | 0.324 | 0.151 |
| tyramine                  | 0.073 | 0.006 | 0.074 | 0.015 | 0.106 | 0.020 | 0.076 | 0.036 | 0.021 | 0.012 |
| tyrosine                  | 0.044 | 0.007 | 0.043 | 0.007 | 0.052 | 0.013 | 0.018 | 0.009 | 0.011 | 0.008 |
| uracil                    | 0.003 | 0.001 | 0.003 | 0.000 | 0.002 | 0.000 | 0.002 | 0.000 | 0.002 | 0.000 |
| urea                      | 0.011 | 0.002 | 0.010 | 0.002 | 0.003 | 0.001 | 0.005 | 0.002 | 0.002 | 0.001 |
| xylitol                   | 0.005 | 0.000 | 0.003 | 0.001 | 0.001 | 0.000 | 0.001 | 0.000 | 0.001 | 0.000 |
| xylose                    | 0.004 | 0.000 | 0.004 | 0.000 | 0.002 | 0.000 | 0.002 | 0.000 | 0.001 | 0.000 |
| xylulose                  | 0.007 | 0.000 | 0.005 | 0.000 | 0.003 | 0.000 | 0.004 | 0.001 | 0.003 | 0.001 |

List of 96 metabolites identified and quantified in plants grown in Agar Control. 30X. 200X. Starch Control and Starch-Mn condition. N=4 biological replicates. P<0.05 for all values according to two-way ANOVA test.

Manganese excess and deficiency affect chloroplast structure and the photosynthetic apparatus in *Marchantia polymorpha*

**Table S3. Metabolites significantly decreased in Starch condition compared to Agar Control in *Marchantia polymorpha***

| Metabolites                    | Agar Control |       | Starch (+/-) |       |
|--------------------------------|--------------|-------|--------------|-------|
|                                | Mean         | SD    | Mean         | SD    |
| 1.6-anhydro-glucose            | 0.005        | 0.001 | 0.002        | 0.001 |
| 2-hydroxypyridine              | 0.021        | 0.003 | 0.013        | 0.003 |
| 3.4-dihydroxymandelic acid     | 0.003        | 0.001 | 0.001        | 0.001 |
| arabinose                      | 0.003        | 0.000 | 0.001        | 0.001 |
| arbutin                        | 0.002        | 0.000 | 0.001        | 0.000 |
| aspartic acid 2                | 0.750        | 0.207 | 0.120        | 0.177 |
| beta-cyano-L-alanine           | 0.002        | 0.000 | 0.001        | 0.000 |
| citrulline 2                   | 0.001        | 0.000 | 0.000        | 0.000 |
| D-(+) trehalose                | 0.053        | 0.003 | 0.029        | 0.020 |
| dopamine (hydroxytyramine)     | 1.589        | 0.178 | 0.436        | 0.213 |
| fumaric acid                   | 0.180        | 0.031 | 0.068        | 0.038 |
| glycerol 1-phosphate           | 0.021        | 0.002 | 0.008        | 0.005 |
| L-alanine 1                    | 0.010        | 0.002 | 0.003        | 0.003 |
| L-asparagine 2                 | 0.372        | 0.021 | 0.083        | 0.136 |
| leucrose                       | 0.003        | 0.000 | 0.001        | 0.001 |
| L-glutamic acid 3 (dehydrated) | 2.642        | 0.178 | 1.110        | 0.707 |
| L-glutamine 1                  | 0.107        | 0.013 | 0.023        | 0.038 |
| L-homoserine 2                 | 0.002        | 0.000 | 0.000        | 0.000 |
| L-lysine 2                     | 0.003        | 0.001 | 0.000        | 0.001 |
| L-methionine sulfoxide 3       | 0.001        | 0.000 | 0.000        | 0.000 |
| L-norleucine 1                 | 0.059        | 0.013 | 0.022        | 0.012 |
| L-serine 1                     | 0.625        | 0.028 | 0.148        | 0.105 |
| L-threonine 1                  | 0.080        | 0.008 | 0.026        | 0.016 |
| L-valine 2                     | 0.046        | 0.007 | 0.024        | 0.010 |
| myo-inositol                   | 0.042        | 0.003 | 0.020        | 0.009 |
| N-methylalanine                | 0.021        | 0.002 | 0.675        | 0.293 |
| O-phosphocolamine              | 0.005        | 0.001 | 0.002        | 0.001 |
| Phenylalanine 1                | 0.018        | 0.002 | 0.005        | 0.004 |
| phytol 1                       | 0.050        | 0.002 | 0.013        | 0.012 |
| putrescine                     | 0.003        | 0.001 | 0.000        | 0.001 |
| pyruvic acid                   | 0.006        | 0.001 | 0.001        | 0.002 |
| rhamnose 1                     | 0.004        | 0.000 | 0.002        | 0.001 |

|                           |       |       |       |       |
|---------------------------|-------|-------|-------|-------|
| stigmasterol              | 0.022 | 0.003 | 0.008 | 0.005 |
| talose 1                  | 0.005 | 0.000 | 0.003 | 0.002 |
| threonic acid             | 0.102 | 0.010 | 0.072 | 0.019 |
| Threonic acid-1.4-lactone | 0.007 | 0.001 | 0.003 | 0.002 |
| tyrosine 2                | 0.044 | 0.007 | 0.015 | 0.016 |
| urea                      | 0.011 | 0.002 | 0.004 | 0.003 |
| xylitol                   | 0.005 | 0.000 | 0.001 | 0.001 |
| xylose 2                  | 0.004 | 0.000 | 0.002 | 0.001 |
| xylulose                  | 0.007 | 0.000 | 0.003 | 0.001 |

List of 41 metabolites significantly different between Agar Control and both Starch Control and Starch-Mn conditions combined ( $p < 0.05$ ). The column Starch (+/-) represents the mean of all starch samples (Starch Control and Starch-Mn). A statistical test ANOVA 2 was conducted. Absolute values represent the mean of 4 biological replicates for each condition.

Messant *et al.*

Manganese excess and deficiency affect chloroplast structure and the photosynthetic apparatus in *Marchantia polymorpha*

**Figure S1. Metabolite analysis in *M. polymorpha* grown in Mn excess condition.**

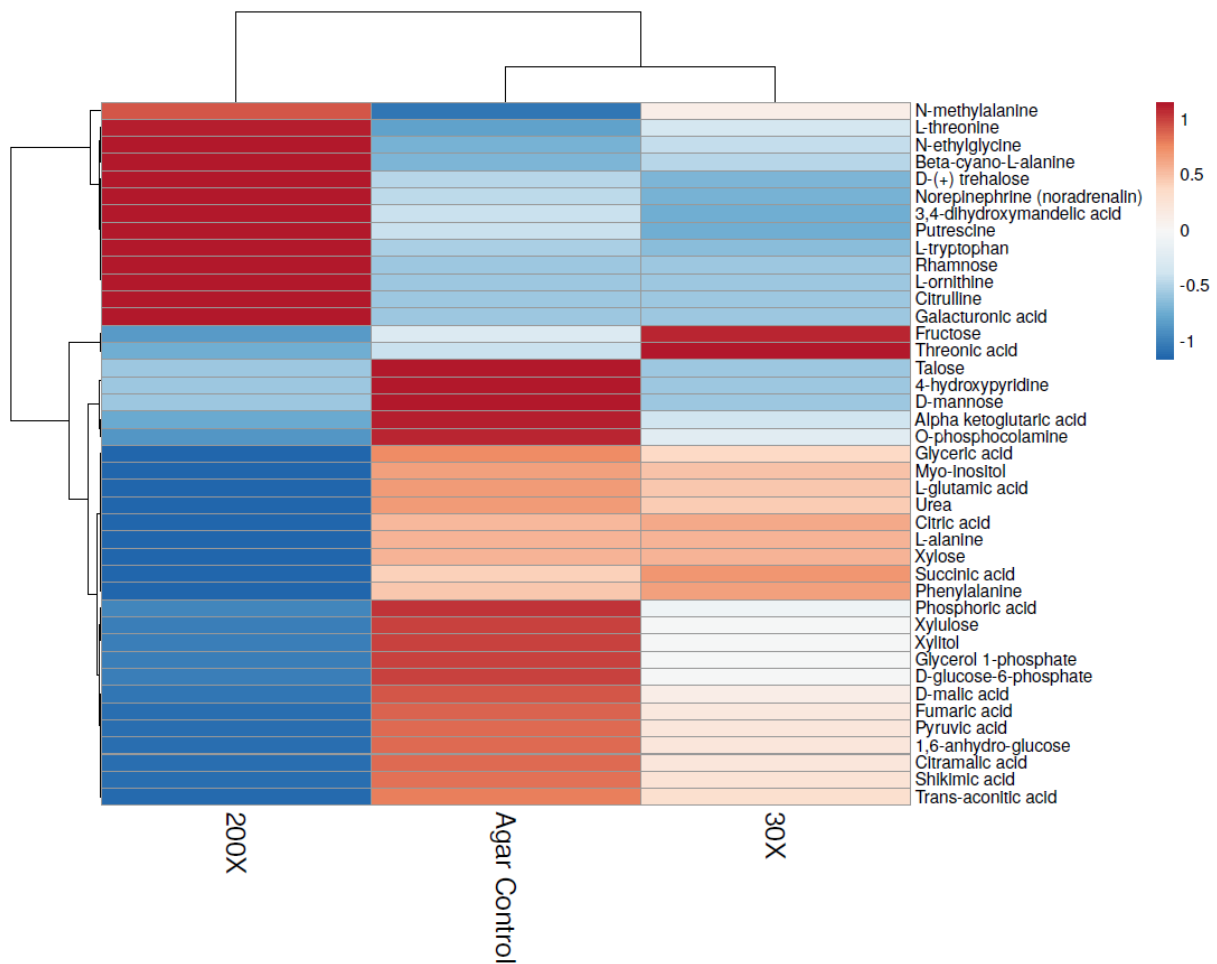

Heatmap showing significantly different metabolites in whole thalli grown under Control, 30X and 200X conditions. This figure is a result of an ANOVA 2 statistical test. The color scale represents the changes between the three conditions taking into account the maximum and the minimum value for a given metabolite in each condition.

Messant *et al.*

Manganese excess and deficiency affect chloroplast structure and the photosynthetic apparatus in *Marchantia polymorpha*

**Figure S2. Estimation of the chloroplast size under the different growth conditions**

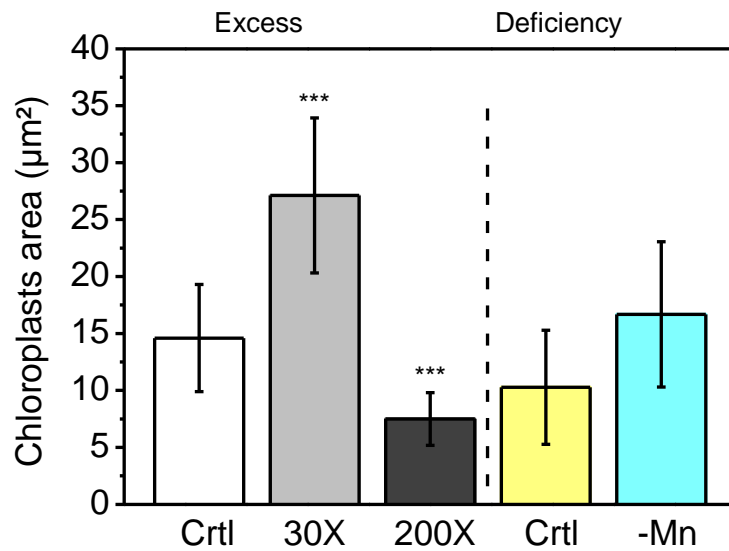

Area of the chloroplasts was determined from super-resolution fluorescence microscopy images using ImageJ. Number of images analyzed: Ctrl agar: N=12, 30X: N=12; 200X: N=23; Ctrl starch: N=25, starch -Mn : N=7. Mean value and SD are given. Stars indicate significant differences, compared to the control, based on a Mann and Whitney test (\*\*\* p<0.001).



Messant *et al.*

Manganese excess and deficiency affect chloroplast structure and the photosynthetic apparatus in *Marchantia polymorpha*

**Figure S3. Chlorophyll fluorescence at room temperature in *M. polymorpha* grown in control and Mn excess conditions**

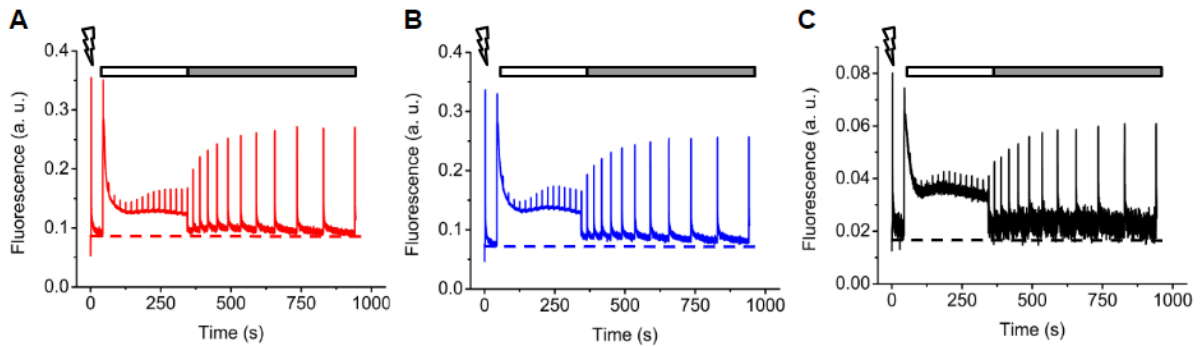

Induction and recovery of chlorophyll measured on thalli grown in Control (red), 30X (blue) and 200X (black) conditions. After 5 min dark adaptation, thalli were exposed to a measuring light to determine the minimum fluorescence level (dashed lines) and to a saturating flash to obtain the maximum fluorescence level. Actinic light ( $50 \mu\text{mol photons m}^{-2} \text{s}^{-1}$ ) was applied for 5 min (white bar). Recovery in the dark was followed (grey bar). Representative curves are shown (N=3).

Messant *et al.*

Manganese excess and deficiency affect chloroplast structure and the photosynthetic apparatus in *Marchantia polymorpha*

**Figure S4. Photoinhibition of photosystem II in *M. polymorpha* grown in control and Mn excess condition in the presence and absence of lincomycin**

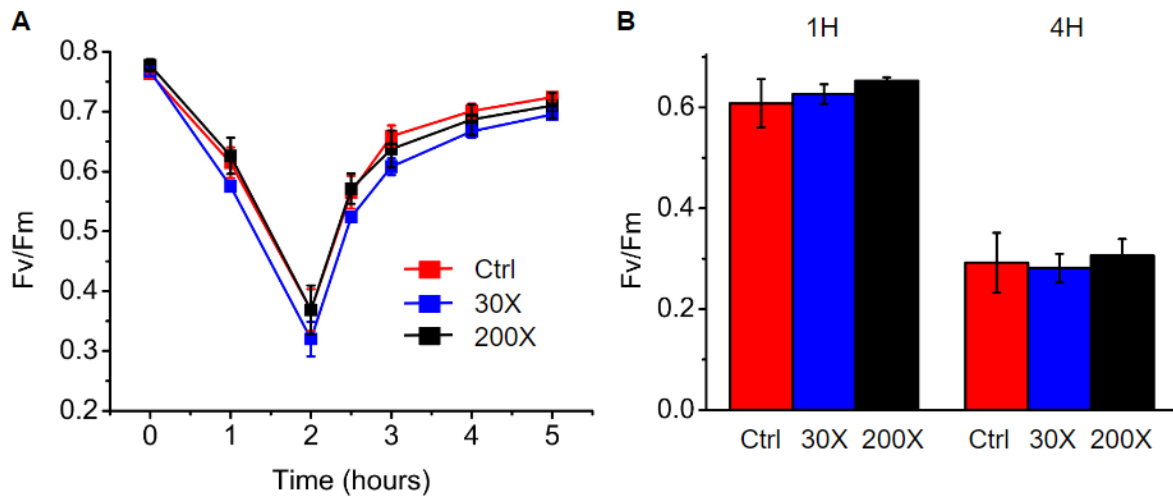

(A) Photoinhibition without lincomycin was measured in thalli cultivated in Control (red), 30X (blue) and 200X (black) conditions. Fv/Fm was followed on plants exposed to a strong light ( $800 \mu\text{mol photons m}^{-2}\text{s}^{-1}$ ) for 2h and during the recovery at room light. (B) Fv/Fm was recorded during photoinhibition of thalli preincubated with lincomycin for 4h. Mean and SD are shown (N=3, biological replicates).

Messant *et al.*

Manganese excess and deficiency affect chloroplast structure and the photosynthetic apparatus in *Marchantia polymorpha*

**Figure S5. Chlorophyll fluorescence (Fv/Fm) in *M. polymorpha* grown on starch plates in low Mn concentrations**

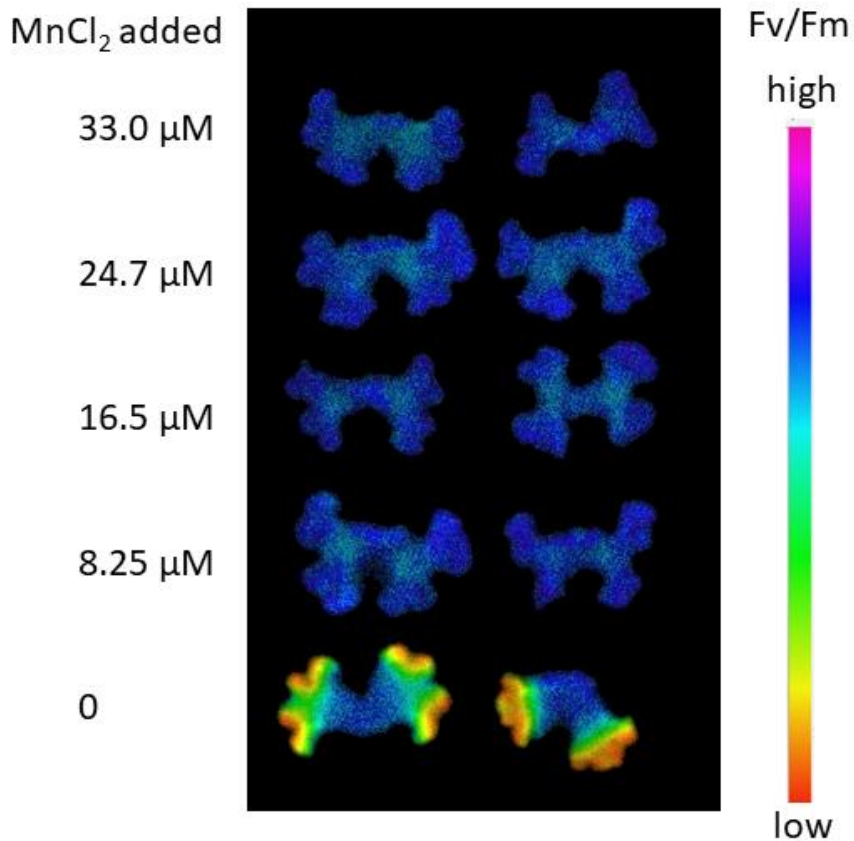

Thalli were grown for 2 weeks on standard medium before transferred for 1 week to starch media with the addition of the indicated Mn concentration. After 1 week growth on starch medium, thalli were dark-adapted for 5 min before Fv/Fm values were determined using an Imaging-PAM (Walz, Effeltrich, Germany). Right: Colour scale corresponds to Fv/Fm value between 1 (pink/high) and 0 (red/low).

Messant *et al.*

Manganese excess and deficiency affect chloroplast structure and the photosynthetic apparatus in *Marchantia polymorpha*

**Figure S6. qN determination in the presence of lincomycin in *Marchantia polymorpha* grown on starch in control and Mn-deficient conditions**

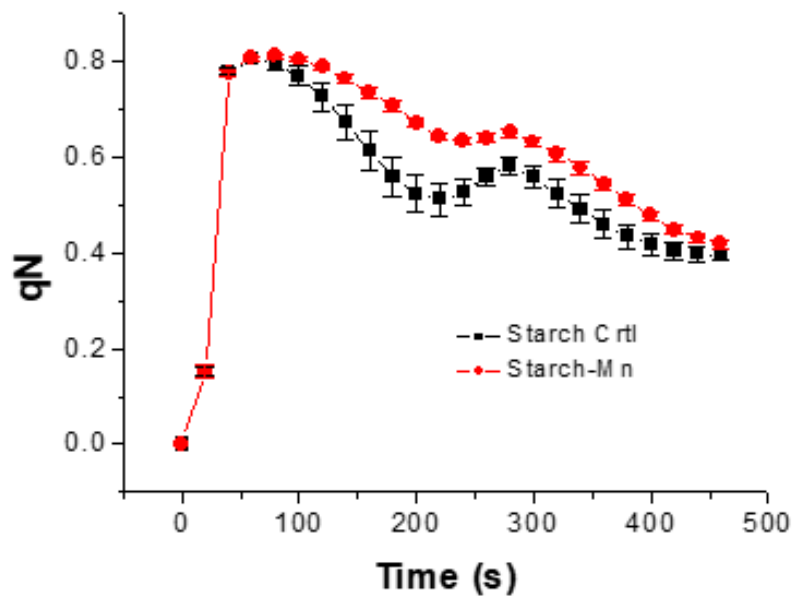

Thalli were incubated for 4 h in lincomycin solution ( $1\text{ g L}^{-1}$ ) prior to the measurements. After 5 min dark adaptation, thalli were exposed to measuring light and to saturating flashes. Actinic light ( $55\ \mu\text{mol quanta m}^{-2}\text{s}^{-1}$ ) was applied during 5 min. Mean and SD are shown (N=4).
